# Supplementary material for: Single Dose of N-Acetylcysteine in Local Anesthesia Increases Expression of HIF1α, MAPK1, TGFβ1 and Growth Factors in Rat Wound Healing
Source: MDPI journal article supplement (doi:10.3390/ijms22168659), 2021-08-12
Supplement: s1 [file s1]

Supplement Table 1 – Gene symbols, full names and primers sequences

| Symbol  | Gene name                                                                               | Forward Primer sequence | Reverse Primer sequence     |
|---------|-----------------------------------------------------------------------------------------|-------------------------|-----------------------------|
| ACTB    | Beta-actin                                                                              | GGGAAATCGTGCGTGACATT    | GCGGCAGTGGCCATCTC           |
| GAPDH   | Glyceraldehyde 3-phosphate dehydrogenase                                                | TGATTCTACCCACGGCAAGTT   | TGATGGGTTTCCCATTGATGA       |
| LDHA    | Lactate dehydrogenase A                                                                 | CCGTTACCTGATGGGAGAAA    | ACGTTACACCACTCCACAC         |
| NONO    | Non-POU Domain Containing Octamer Binding                                               | AAATGGCTATGGGAGGTGCC    | CAGCTTGGCCAAAACGTTCA        |
| PPIH    | Peptidyl-prolyl isomerase H                                                             | GCCAGTATTTACCGGGGTCC    | ACATCCTTTACCTGGTTCAGT       |
| GDC     | Solute carrier family 25 (mitochondrial carrier; Graves disease autoantigen), member 16 | AAGAGCCATCTTGGGCTGAC    | TGAGGGGGTACAACATGTGC        |
| ACTA2   | Actin alpha 2 skeletal muscle                                                           | CATCCGACCTTGCTAACGGA    | GTCCAGAGCGACATAGCACA        |
| ACTC1   | Actin, alpha 1 skeletal muscle                                                          | ATTATTGCTCCCCCTGAGCG    | CTGAGTGTAAGGTAGCCGCC        |
| ANGPT1  | Angiotensinogen 1                                                                       | ACGCTGAACGGTTACACAGA    | TTCCCGTCGTGTTCTGGAAG        |
| CCL2    | C-C Motif Chemokine Ligand 2                                                            | ATGCAGTTAATGCCCCACTC    | TTCCTTATTGGGGTCAGCAC        |
| CD40LG  | TNF-Related Activation Protein                                                          | GGCAGCGAATACCCACAGTT    | CACTTGGCTTGCTTCAGTCAC       |
| CDC42   | Cell division control protein 42 homolog                                                | CGGAGAAGCTGAGGTCAACA    | GCGTTCATAGCAGCACACAC        |
| CDH1    | E-cadherin                                                                              | CGTGGATGTGGTAGACGTGAA   | TTCTCCGCAGGCACAAAAAT        |
| COL14A1 | Collagen Type XIV Alpha 1 Chain                                                         | GAATTGGGGGCCCAACAAC     | CGGGTTAGACACGAAGGAGG        |
| COL1A2  | Collagen Type I Alpha 2 Chain                                                           | AGGTGAAGCTGGCAACATCG    | GGATGGCCTTTCTCACCAGGTT      |
| COL3A1  | Collagen Type III Alpha 1 Chain                                                         | CACCCCTCTCTATTTTGGCAC   | AGACTCATAGGACTGACCAAGGTAGTT |
| COL4A1  | Collagen Type IV Alpha 1 Chain                                                          | TGGAACGAAAGGGACACGAG    | TCACCGGGATCTCCCTTCAT        |
| COL4A3  | Collagen Type IV Alpha 3 Chain                                                          | CCCAAAGGCATCAGGGGAAT    | GTGCATCATAACATTTTACTGGACC   |
| COL5A1  | Collagen Type V Alpha 1 Chain                                                           | GTCTGAGGGAGCCAGAATCAC   | GCCTTATCGTAGCTGCCTGT        |
| COL5A3  | Collagen Type V Alpha 3 Chain                                                           | CTCCAGCTGTCCAGAGTGACTG  | CATGTGGGGACGCTGAGAAG        |
| CSF2    | Granulocyte Colony-Stimulating Factor                                                   | AAATGACATGCGTGCTCTGG    | TGGCTATCATGGTCAAGGCG        |
| CSF3    | Granulocyte Colony-Stimulating Factor                                                   | CTGTGGAGCAGGGAAGGAGA    | GCGGCAGGAATCAATACTCG        |
| CSK     | Tyrosine-protein kinase                                                                 | AGCTGAGTCCTACCTTCCCA    | AAGGCCGGTCTGTTACTTGG        |
| CTGF    | Connective tissue growth factor                                                         | CTGTGGGAGAAAACACCCCA    | CACTCTTCCAGGAGGCTCAC        |
| CTNNA1  | Catenin Beta 1                                                                          | CGTGAGCCTTAAGCTCCATT    | GTATAGACAGACGCCCTGC         |
| CTSG    | Cathepsin G                                                                             | AAGCAGCAGTGGAACCCCTC    | TGAAGTTGGATGGATGCCCA        |
| CTSK    | Cathepsin K                                                                             | TCCTCAACAGTGCAAGCGAA    | CCAGCGTCTATCAGCACAGA        |
| CTSV    | Cathepsin V                                                                             | GTGTTCCGTGAGCCTCTGTTC   | CGGAACATCTGTCTTCAAGAGC      |

|       |                                                      |                           |                          |
|-------|------------------------------------------------------|---------------------------|--------------------------|
| CXCL1 | C-X-C Motif<br>Chemokine Ligand 1                    | CAATGAGCTGCGCTGTCAGT      | TTGAAGTGAATCCCTGCCACT    |
| CXCL2 | C-X-C Motif<br>Chemokine Ligand 2                    | GCGCCCAGACAGAAGTCATA      | CAGGTACGATCCAGGCTTCC     |
| CXCL8 | C-X-C Motif<br>Chemokine Ligand 8<br>(Interleukin 8) | GAAGATAGATTGCACCGA        | CATAGCCTCTCACACATTTC     |
| EGF   | Epidermal growth<br>factor                           | AACACGGAGGGAGGCTACAA      | CCCTGGGGGAGCTTAGAGAAAAG  |
| EGFR  | Epidermal growth<br>factor receptor                  | CCACCAAGACAGGCGACG        | AGCAGTAGCTTGTTCTCGC      |
| ELANE | Neutrophil Elastase                                  | TGGTGGACCCTTGGTCTGTA      | TAAGTGGCCGGTCATCATGG     |
| F13A1 | Coagulation Factor<br>XIII A Chain                   | GCAGAGGGAACCCCATCAAA      | GGGATGCCGTAGGCATAGAC     |
| F3    | Tissue Factor,<br>Coagulation Factor<br>III          | TGCTTCTTCGTACAAGCCGT      | GAGGTCTCGGTAACAGTGCC     |
| FGA   | Fibrinogen Alpha<br>Chain                            | TGCCTCATCCTGAGCTTGG       | CCACGAATATCTCCTCTGCT     |
| FGF10 | Fibroblast Growth<br>Factor 10                       | CGGAGTTGTTGCCGTCAAAG      | GCCACATACATTTGCCTGCC     |
| FGF2  | Fibroblast Growth<br>Factor 2                        | TTCACAGCCTGTGCTCTAGGG     | GATCGGGTCAGGTTTGGAAA     |
| FGF7  | Fibroblast Growth<br>Factor 7                        | AGGGAGGGGTGGCTTTTATG      | CGTGCATTTGCTGCTTGACT     |
| FIGF  | Vascular Endothelial<br>Growth Factor D              | TCTGGGTGTCATGTTACAGGC     | CAGGCTGGAACCCAACTATGG    |
| HBEGF | Heparin Binding<br>EGF Like Growth<br>Factor         | AGGACTTGGAAGGGACCGAT      | GGAACCGCCATCTCAGAAGT     |
| HGF   | Hepatocyte Growth<br>Factor                          | ACAGCTTTTGCCTTCGAGC       | GCAAGAATTTGTGCCGGTGT     |
| HIF1A | Hypoxia Inducible<br>Factor 1 Subunit<br>Alpha       | ATCTGAGGACACGAGCTGCC      | GCATCGGGCTCTTTCTTAAGC    |
| IFNG  | Interferon Gamma                                     | ATTCATGAGCATCGCCAAGTTC    | TGACAGCTGGTGAATCACTCTGAT |
| IGF1  | Insulin Like Growth<br>Factor 1                      | AATGTGCGGTTCTGTGGGAG      | CTCATCCACAATGCCCCTCT     |
| IL10  | Interleukin 10                                       | TTGAACCACCCGGCATCTAC      | CCAAGGAGTTGCTCCCGTTA     |
| IL1A  | Interleukin 1 alpha                                  | CCATCCAACCCAGATCAGCA      | TCTCTCCCGATGAGTAGGC      |
| IL1B  | Interleukin 1 beta                                   | GACCTGTTCTTTGAGGCTGACA    | CTCATCTGGACAGCCCAAGTC    |
| IL4   | Interleukin 4                                        | GTACCAGACGTCCTTACGGC      | CAGACCGCTGACACCTCTAC     |
| IL6   | Interleukin 6                                        | TAGTCCTTCCTACCCAACTTCC    | TTGGTCCTTAGCCACTCCTTC    |
| IL6ST | Interleukin 6 Signal<br>Transducer                   | CCGACTTCCCTGACGTTGT       | CACGGGAAGTGAAGAACGC      |
| ITGA1 | Integrin Subunit<br>Alpha 1                          | CTAAGCAGACACAGGTCGGG      | CGATTCTCCGTCGGTCACAA     |
| ITGA5 | Integrin Subunit<br>Alpha 5                          | CCCTCGTTTACACATGCCCT      | ATGAATCTTTGACGGCGGGA     |
| ITGB1 | Integrin Subunit<br>Beta 1                           | ACAAGAGTGCCGTGACAACT      | CTTCCGCACGCATCATTGAG     |
| ITGB3 | Integrin Subunit<br>Beta 3                           | TGACCCGCTTCAATGACGAA      | ATGGGTCTTGGCATCAGTGG     |
| ITGB5 | Integrin Subunit<br>Beta 5                           | CACGGTCCATCATCTCTCGG      | CATGGAGAGGGAGAGGTCCA     |
| ITGB6 | Integrin Subunit<br>Beta 6                           | AGCTCAAGTTACTTTTCAAAGCAGT | TCTGTGACCTACGCTGAGA      |
| MAPK1 | Mitogen-activated<br>protein kinase 1                | TGGTTCTACCGGCGGTAGT       | AACGAGGAGGGAGGACAACAC    |

|          |                                                    |                            |                             |
|----------|----------------------------------------------------|----------------------------|-----------------------------|
| MAPK3    | Mitogen-activated protein kinase 3                 | CCAGCTCTGGTAGACGGTTC       | GCTCCTCAGGGAAACTAGCC        |
| MMP1     | Matrix metalloproteinase-1                         | AGCTCATACAGTTTCCCCGT       | GCCTCAGCTTTTCAGCCATC        |
| MMP2     | Matrix metalloproteinase-2                         | TTTGCTCGGGCCTTAAAAGTAT     | CCATCAAACGGGTATCCATCTC      |
| MMP7     | Matrix metalloproteinase-7                         | ACAGACTTGCCTCGGTTCTT       | GTCTCCGTGATCTCCCCTTG        |
| MMP9     | Matrix metalloproteinase-9                         | GTGCCCTGGAACTCACACAAC      | CCAGAAGTATTTGTCATGGCAGAA    |
| NGF      | Nerve growth factor                                | ACGCCCCCTTCTCCTCTCACAAAGTG | GGCTGTGTCAAGGGAATGCTGAAG    |
| PDGFA    | Platelet-derived growth factor subunit A           | CAGGACAGGACGCGTAGAAC       | CGGGTTGCTCGAGGTCTTAG        |
| PDGFB    | Platelet-derived growth factor subunit B           | AGAGCCTGGCATTTAGCCTG       | GGTGCCATGAGAGTTCCTCC        |
| PDGFC    | Platelet-derived growth factor subunit C           | CCGGCATGAGAGAGTTGTCA       | TCAGCTGGATCCGCACATT         |
| PDGFD    | Platelet-derived growth factor subunit D           | CAGAGCGCATCCATCAAAGC       | TCTTCTCTGACAACGGTGC         |
| PDGFRA   | Platelet-derived growth factor receptor Alpha      | GAACCCCTCTGGCCTTCATTC      | TTGACCTCTTTCGTGGCCTG        |
| PDFGRB   | Platelet-derived growth factor receptor Beta       | GTAAAGCCCACAGTGGTGTGA      | CCCAGGAGCAATAGCACGAA        |
| PLAT     | Plasminogen activator, tissue type                 | GCATCATCCACACAGAAGGGA      | TTCATCTCTGCAGGTCGCTC        |
| PLAU     | Plasminogen Activator, Urokinase type              | ACTGCTTCGTGAATCAGCCA       | TGGAAGGCCAGAGTTTCGTC        |
| PLAUR    | Plasminogen Activator, Urokinase receptor          | AGAGCTTACCACCGAATGGC       | CAATGAGGACGTCTCTTCGTAGG     |
| PLG      | Plasminogen                                        | GCCCAACCTACCAATGTCTGA      | TTGGTAGTGGACGATGTGCC        |
| PRTN3    | Proteinase 3                                       | AATCCGCCCATCCCTCAAAG       | TGCAGGGATGCCACATAAGG        |
| PTEN     | Phosphatase And Tensin Homolog                     | ATTCCCAGTCAGAGGCGCTA       | TCACCTTTAGCTGGCAGACC        |
| PTGS2    | Prostaglandin-Endoperoxide Synthase 2              | CTCAGCCATGCAGCAAATCC       | GGGTGGGCTTCAGCAGTAAT        |
| RAC1     | Rac Family Small GTPase 1                          | TGCTCAGAAAATGGCGGAGT       | GTTCTCAGCACAACGCAACT        |
| RHOA     | Ras Homolog Family Member A                        | GTAGCCTACCACTGCGAAGC       | CCGTGGGCACATAAACCTCT        |
| SERPINE1 | Plasminogen Activator Inhibitor 1                  | CACTACGCCTTCACTCAGCA       | TCGGGCGATCATTGCATCTG        |
| STAT3    | Signal transducer and activator of transcription 3 | TGGAAGAGGCGGCAGCAGATAGC    | CACGGC CCCCATTCCCACAT       |
| TAGLN    | Transgelin                                         | ATCCTATGGCATGAGCCGTG       | CAGGCTGTTACCAACTTGC         |
| TGFA     | Transforming growth factor alpha                   | CGCACGTACACACACCAAAC       | TCAGTGCATCATATACAGAAGTCAGAA |
| TGFB1    | Transforming growth factor beta 1                  | AGGACCTGGGTGGAAGTGG        | AGTTGGCATGGTAGCCCTTG        |
| TGFB2    | Transforming growth factor beta 2                  | GTGTTTTTCATCATGCTGGCT      | CGTGAAGTGGCTGTTGATCT        |

|        |                                                   |                           |                       |
|--------|---------------------------------------------------|---------------------------|-----------------------|
| TGFBR3 | Transforming<br>Growth Factor Beta<br>Receptor 3  | GCCTAGCTGAACCAAGGTGT      | CTCCCCACAAAGGCTAGCAA  |
| TIMP1  | Metallopeptidase<br>inhibitor 1                   | CACCCCTCGCATGGACATTTA     | CCGGAAACCTGTGGCATTTTC |
| TNF    | Tumor necrosis<br>factor                          | GACCCTCACACTCAGATCATCTTCT | TGCTACGACGTGGGCTACG   |
| VEGFA  | Vascular endothelial<br>growth factor A           | ACTCATCAGCCAGGGAGTCT      | GAGCCCAGAAGTTGGACGAA  |
| VEGFB  | Vascular endothelial<br>growth factor B           | GTGGTCAAACAACCTCGTGCC     | CCTGTGGAGTCCGAAAAGCA  |
| VEGFC  | Vascular endothelial<br>growth factor C           | ATGTGGGGAAGGAGTTTGGA      | GTTTGGGGCCTTGAGAGAGA  |
| WISP1  | WNT1-inducible-<br>signaling pathway<br>protein 1 | GCATAGCCTACACTAGCCCC      | TTCCCTGCCTTGATGTGTGG  |
| WNT5A  | Wnt Family Member<br>5A                           | GCTTCGCCCATGGAAGATA       | CCTAACAGTCCGGTTTGGGT  |
