# Supplementary material for: Single Dose of N-Acetylcysteine in Local Anesthesia Increases Expression of HIF1α, MAPK1, TGFβ1 and Growth Factors in Rat Wound Healing
Source: MDPI journal article supplement (doi:10.3390/ijms22168659), 2021-08-12
Supplement: s1 [file s1]

Supplement File 1 – QuPath script for automated assessment of immunohistochemical staining with anti-MPO, anti-CD31 and anti-CD68 antibodies

### Script for anti-MPO

```
setImageType('BRIGHTFIELD_H_DAB');

setColorDeconvolutionStains({'Name': "H-DAB default", "Stain 1": "Hematoxylin", "Values 1":
"0.65111 0.70119 0.29049 ", "Stain 2": "DAB", "Values 2": "0.26917 0.56824 0.77759 ", "Background": "
255 255 255 "});

selectAnnotations();

runPlugin('qupath.imagej.detect.nuclei.PositiveCellDetection', '{"detectionImageBrightfield":
"Hematoxylin OD", "requestedPixelSizeMicrons": 0.5, "backgroundRadiusMicrons": 8.0,
"medianRadiusMicrons": 0.0, "sigmaMicrons": 1.5, "minAreaMicrons": 10.0, "maxAreaMicrons": 400.0,
"threshold": 0.1, "maxBackground": 2.0, "watershedPostProcess": true, "excludeDAB": true,
"cellExpansionMicrons": 5.0, "includeNuclei": true, "smoothBoundaries": true, "makeMeasurements":
true, "thresholdCompartment": "Cytoplasm: DAB OD mean", "thresholdPositive1": 0.2,
"thresholdPositive2": 0.4, "thresholdPositive3": 0.6, "singleThreshold": true}');
```

### Script for anti-CD31 and anti-CD68

```
setImageType('BRIGHTFIELD_H_DAB');

setColorDeconvolutionStains({'Name': "H-DAB default", "Stain 1": "Hematoxylin", "Values 1":
"0.65111 0.70119 0.29049 ", "Stain 2": "DAB", "Values 2": "0.26917 0.56824 0.77759 ", "Background": "
255 255 255 "});

selectAnnotations();

runPlugin('qupath.imagej.detect.nuclei.PositiveCellDetection', '{"detectionImageBrightfield":
"Hematoxylin OD", "requestedPixelSizeMicrons": 0.5, "backgroundRadiusMicrons": 8.0,
"medianRadiusMicrons": 0.0, "sigmaMicrons": 1.5, "minAreaMicrons": 10.0, "maxAreaMicrons": 400.0,
"threshold": 0.1, "maxBackground": 2.0, "watershedPostProcess": true, "excludeDAB": true,
"cellExpansionMicrons": 5.0, "includeNuclei": true, "smoothBoundaries": true, "makeMeasurements":
true, "thresholdCompartment": "Cell: DAB OD mean", "thresholdPositive1": 0.2, "thresholdPositive2":
0.4, "thresholdPositive3": 0.6, "singleThreshold": true}');
```
